# Supplementary material
Source: Elsevier journal article supplement (https://cris.unibo.it/retrieve/6600a586-c5dd-48df-a9eb-d70faaf36d81/mmc1.docx)
Supplement: mmc1 [file mmc1.docx]

*Appendix 1: List of patient questionnaires adopted in the PEONY study*

| Questionnaire | Abbreviation | Domain | Brief description | No. of items | Scoring |
| --- | --- | --- | --- | --- | --- |
| European Vulvovaginal Epidemiological Survey | EVES | Vaginal and vulvar health | Symptoms of VVA are assessed using the specific section of the European Vulvovaginal Epidemiological Survey (EVES). Women are asked to score their symptoms of VVA, based on a list of 19 potentially VVA-related complaints on a four-point severity scale (absent, mild, moderate or severe). Vaginal symptoms include vaginal dryness (internal), pain during intercourse (internal), pain during intercourse at penetration, bleeding during intercourse, bleeding during sexual contact, burning or irritation (internal), itching (internal), vaginal discharge; vulvar symptoms include vaginal dryness (external), burning or irritation (external), itching (external) and pain during exercise; urinary symptoms include urinary incontinence, urinary urgency, urinary frequency, urinary difficulties, recurrent urinary tract infections and post-coital cystitis. In addition, a single question investigates the presence and severity of abdominal pain. | 19 | absent to severe |
| The Day-to-Day Impact of Vaginal Aging | DIVA | Impact of vaginal aging | The Day-to-Day Impact of Vaginal Aging (DIVA) questionnaire is a structured, validated, self-administered instrument assessing the multidimensional impact of vaginal symptoms on functioning and well-being. The DIVA instrument consists of four multi-item domain scales addressing major dimensions of functioning and well-being affected by postmenopausal vaginal symptoms: (1) activities of daily living (five items), (2) emotional wellbeing (four items), (3) self-concept and body image (five items), and (4) sexual functioning (nine items for a long version appropriate for sexually active women, and five items for a shorter version appropriate for women without a recent history of sexual activity). The questionnaire addresses symptom impact in the four weeks prior to survey self-administration. Each scale is designed to be scored from 0 to 4, with higher scores indicating greater impact of symptoms on the relevant domain. | 23 | 0-4 |
| The Female Sexual Function Index | FSFI | Female sexual function | The Female Sexual Function Index (FSFI) is a brief, 19-item self-report measure of female sexual function over the past four weeks. The instrument provides scores on six domains of sexual function as well as a total score. The domains include: desire (2 items), arousal (4 items), lubrication (4 items), orgasm (3 items), satisfaction (3 items), and pain (3 items). The full-scale score ranges from 2.0 to 36.0, where a higher score is associated with less severity of sexual dysfunction. | 19 | 2.0-36.0 |
| The Female Sexual Distress Scale-Revised | FSDS-R | Female sexual distress | The Female Sexual Distress Scale-Revised (FSDS-R) is a self-administered questionnaire consisting of 13 items that relate to different aspects of sexual distress. Every item requires an answer that is then rated as 0–4 (never [0], rarely [1], occasionally [2], frequently [3], always [4]). The total score, ranging from 0 to 52, provides a measure of sexual distress, in which the higher the score, the higher the level of sexual distress. The FSDS-R is identical to the FSDS except for the addition of one question that asks women to rate their level of distress related to low sexual desire. | 13 | 0-48 |
| SF-12 Health Survey | SF12 | Physical and mental functioning | The SF-12® Health Survey (SF-12) is a 12-item questionnaire used to assess generic health outcomes from the patient’s perspective. The SF-12 consists of a subset of 12 items from the SF-36® Health Survey (SF-36) covering the same eight domains of health outcomes, including physical functioning, role-physical, bodily pain, general health, vitality, social functioning, role-emotional, and mental health. A Physical Component Summary Score (PCS) and a Mental Component Summary Score (MCS) can also be calculated. PCS and MCS are standardized so that in the normal population a value of 50 with a standard deviation of 10 is expected. SF-12 scales and summary measures are scored so that a higher score indicates a better health state. | 12 | 0-100 |
